# Supplementary figures and images for: Simultaneous determination of ginkgolides A, B and K in human plasma by UPLC-MS/MS and its application to the pharmacokinetic study of Ginkgo Diterpene Lactone Meglumine Injection in humans
Source: Royal Society of Chemistry journal article supplement (doi:10.1039/c5ay02892b), 2016-01-01

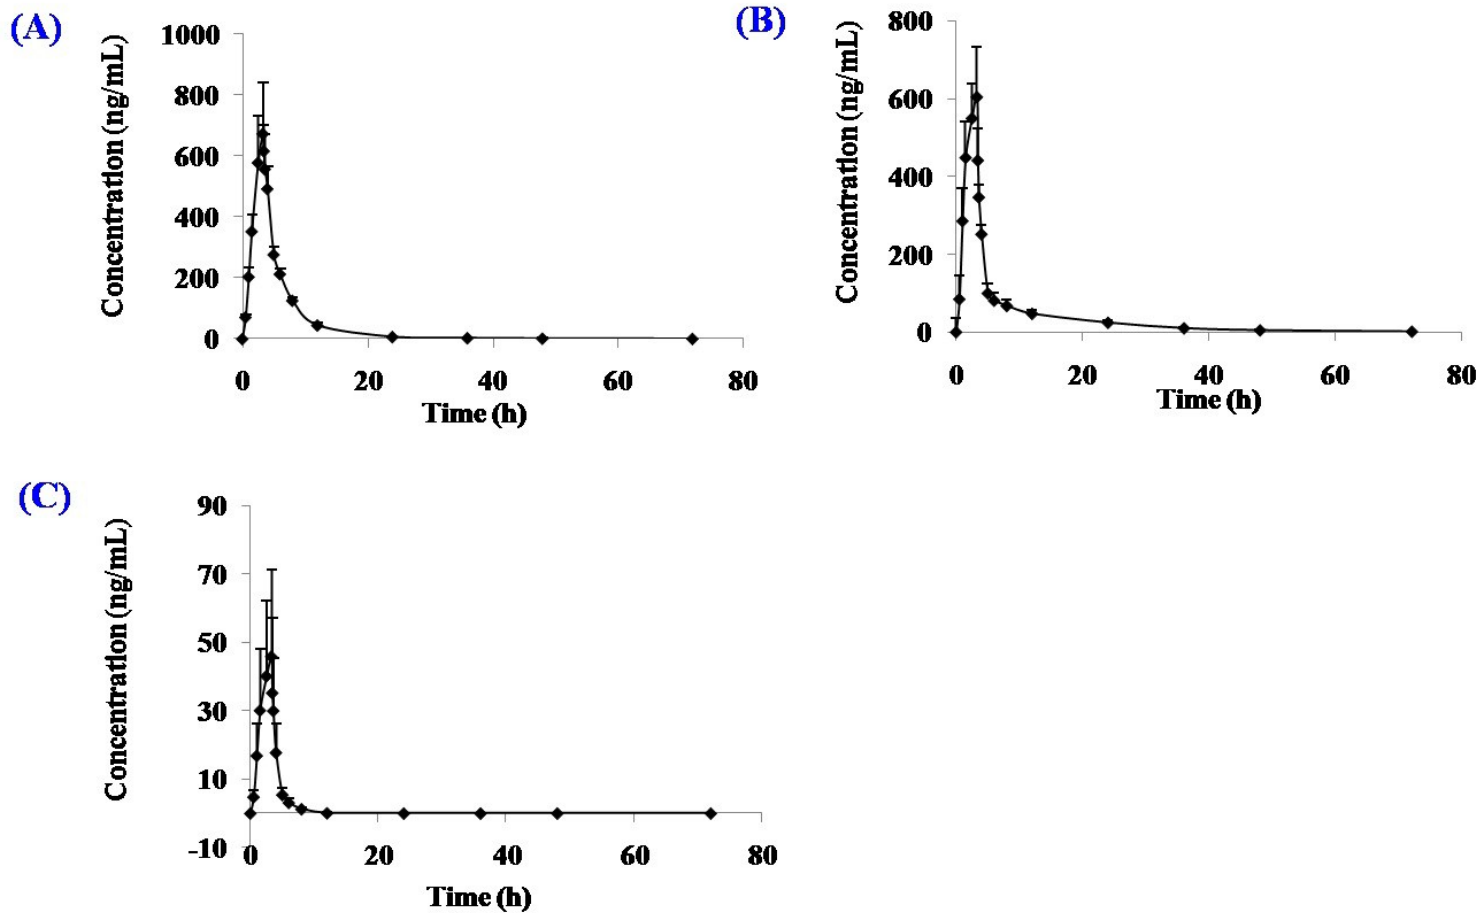

Figure S1

Supplement: c5ay02892b1.pdf [file c5ay02892b1.pdf]
